# Supplementary material for: Inositol triphosphate-triggered calcium release blocks lipid exchange at endoplasmic reticulum-Golgi contact sites
Source: PubMed Central journal article supplement (PMC8113574; doi:10.1038/s41467-021-22882-x), 2021-05-11
Supplement: 41467_2021_22882_MOESM2_ESM.pdf [file 41467_2021_22882_MOESM2_ESM.pdf]

## **Description of Additional Supplementary Files**

**Supplementary Data 1:** Quantitative mass spectrometric analysis of total lipids or plasma membrane fractions from control and INPP5A-depleted HeLa cells
